# Supplementary material for: Accurate modulation of NiS cocatalysts on the photoelectron transfer sites of BiVO4 for photocatalytic H2O2 generation
Source: Royal Society of Chemistry journal article supplement (doi:10.1039/d3cy00331k), 2023-01-01
Supplement: d3cy00331k1.pdf [file d3cy00331k1.pdf]

## Supporting Information

### **Accurate modulation of NiS cocatalyst on photoelectron transfer sites of BiVO<sub>4</sub> for photocatalytic H<sub>2</sub>O<sub>2</sub> generation**

Haiyang Shi<sup>a#</sup>, Shuaikang Li<sup>a#</sup>, Min Wang<sup>a</sup>, Xinyu Yin<sup>a</sup>, Junxian Huang<sup>a</sup>, Wenjing Qi<sup>a</sup>,

Xuefei Wang<sup>a\*</sup>, Ping Wang<sup>a</sup>, Feng Chen<sup>a</sup>, Huogen Yu<sup>b\*</sup>

<sup>a</sup> School of Materials Science and Engineering, and School of Chemistry, Chemical Engineering and Life Sciences, Wuhan University of Technology, Wuhan 430070, PR China

<sup>b</sup> Laboratory of Solar Fuel, Faculty of Materials Science and Chemistry, China University of Geosciences, Wuhan, 430074, PR China

#Haiyang Shi and Shuaikang Li contributed equally.

\*Corresponding authors. Tel: +86(27)87749379; Fax: +86-27-87879468;

\* Corresponding authors: xuefei@whut.edu.cn and yuhuogen@cug.edu.cn

### **SI-1 Synthesis of BiVO<sub>4</sub> photocatalyst**

Typically, NH<sub>4</sub>VO<sub>3</sub> (0.8422 g) and Bi(NO<sub>3</sub>)<sub>3</sub>·5H<sub>2</sub>O (3.4925 g) precursor were respectively dissolved into 30 mL HNO<sub>3</sub> solution (2 mol L<sup>-1</sup>) and mixed them homogeneously. Then, ammonia solution (28%) was added into the above solution by dropwise to adjust the pH of the solution (pH = 2.0) under vigorous stirring. After stirring for 0.5 h and aging for 2 h at room temperature, the resultant yellow suspension was carried out hydrothermal treatment in a 100 mL Teflon-lined autoclave at 180 °C for 24 h. After the reaction system was naturally cooled to room temperature, yellow powder was obtained by washing and drying at 60 °C overnight.

### **SI-2 Characterization**

The morphology and microstructure of photocatalysts were observed by the field emission scanning electronic microscope (SEM) and high-resolution transmission electron microscopy (TEM). The crystal structure was revealed by X-ray diffraction (XRD) patterns using Cu K $\alpha$  radiation. UV-visible diffuse reflectance spectra (UV-vis DRS) were obtained using a UV-2450 instrument (Shimadzu, Japan). The surface information was obtained using a KRATOA XSAM800 XPS system with Mg K $\alpha$  source radiation. The adventitious carbon C 1s peak was set at 284.8 eV to calibrate all the binding energies. The transient photoluminescence spectra were recorded by a FLS920 fluorescence lifetime spectrophotometer (Edinburgh instruments, UK). The element analysis of the samples was performed by inductively coupled plasma emission spectrometry (ICP-OES, Agilent 730, America). Electron spin resonance (ESR) was measured by ESR spectrometer (A300, Bruker).

### SI-3 Photoelectrochemical measurements

The photoelectrochemical measurements were carried out on a standard three-electrode configuration (CHI660E): platinum wire and Ag/AgCl are used as the counter and reference electrode, respectively. In addition, a sample-coated FTO conductor glass serves as the working electrode. The Na<sub>2</sub>SO<sub>4</sub> solution (0.5 mol L<sup>-1</sup>) functions as electrolyte. A 420-nm LED lamp (3 W, 20 mW cm<sup>-2</sup>) was employed as the light source. Meanwhile, the prepared sample (10 mg) was dispersed into a mixing solution of ethanol (2.5 mL) and D-520 Nafion (2.5 mL) with ultrasonic treatment. Then, the obtained slurry was spread on the precleaned FTO glass and then dried at 40 °C for 24 h. The photocurrent responses (*i*-*t* curves) can be obtained at a +0.5 V bias potential during the repeated ON/OFF with a set time period of 60 s. Photoelectrochemical impedance spectroscopy (EIS) was measured in the frequency range of 0.001–10<sup>6</sup> Hz.

### SI-4 Photocatalytic performance of photodegradation

Methyl orange (MO) aqueous solution is used as model pollutant molecule to further assess the photocatalytic performance of the synthetic NiS/BiVO<sub>4</sub> photocatalysts. Typically, the 80 mg of photocatalyst was dispersed into MO solution (20 mg L<sup>-1</sup>) in a glass bottle. The above suspension was stirred under the dark for 1 h to obtain adsorption-desorption equilibrium. After visible-light irradiation for specific time interval, the supernatant of suspension was centrifuged to measure the concentration of MO by a UV-visible spectrophotometer. The photocatalytic degradation process of MO aqueous solution can be considered as a pseudo-first order reaction. In this case, the kinetic equation is expressed as  $\ln(c_0/c) = kt$  ( $c_0$  is the initial concentration of MO and

$c$  is the MO concentration after irradiation for  $t$  min,  $k$  is the apparent rate constant).

#### SI-5 The calculation of AQE

The apparent quantum efficiency (AQE) of the prepared photocatalyst is calculated via the following equation:

$$\begin{aligned}\text{AQE}(\%) &= \frac{\text{number of reacted electrons}}{\text{number of incident photons}} \times 100\% \\ &= \frac{\text{number of evolved } H_2O_2 \text{ molecules} \times 2}{\text{number of incident photons}} \times 100\%\end{aligned}$$

The power of the visible light (a 420 nm-LED lamp, 3 W) was  $20 \text{ mW} \cdot \text{cm}^{-2}$ . Hence, the AQE of the NiS/BiVO<sub>4</sub> photocatalyst can be calculated and shown in Table S3.

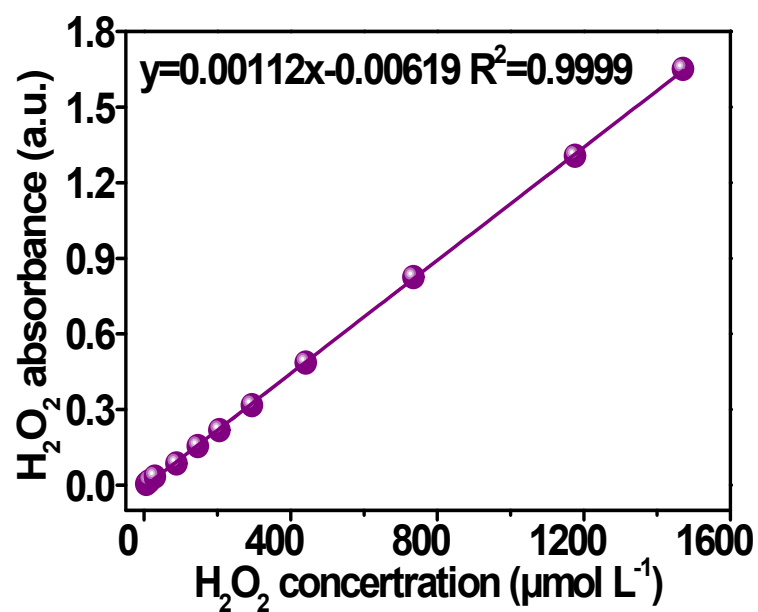

Fig. S1.  $\text{H}_2\text{O}_2$  concentration-absorbance standard curve.

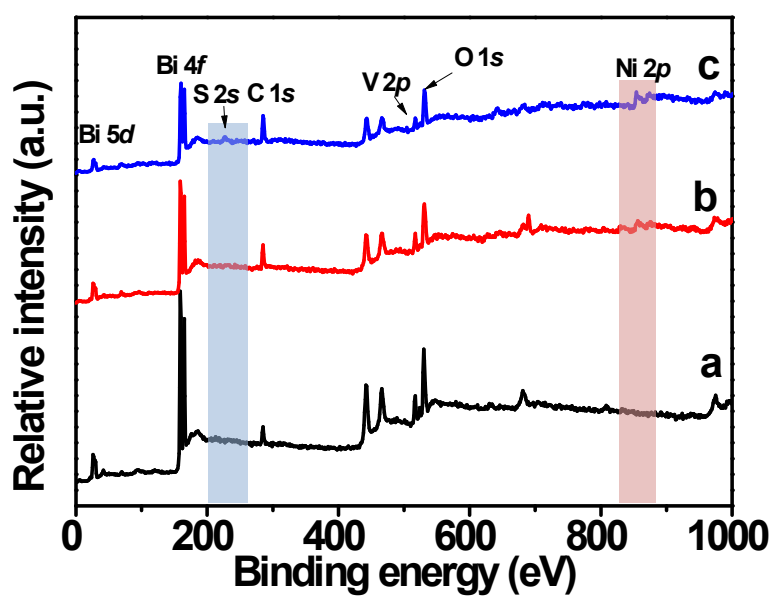

Fig. S2. Full-range XPS spectra for various samples: (a)  $\text{BiVO}_4$ , (b) 1 wt%  $\text{NiS/BiVO}_4$  and (c) 10 wt%  $\text{NiS/BiVO}_4$ .

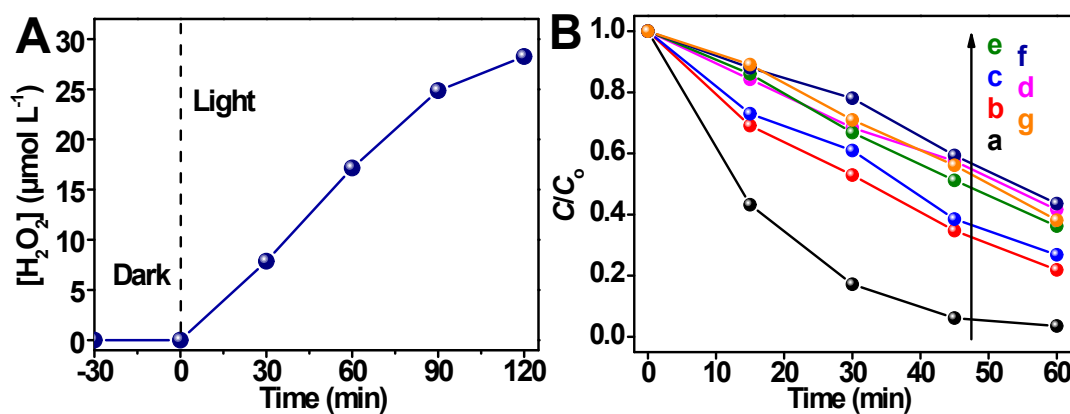

**Fig. S3.** (A) Photocatalytic H<sub>2</sub>O<sub>2</sub>-production activity of 10 wt% NiS/BiVO<sub>4</sub> photocatalyst in the pure water; (B) photocatalytic H<sub>2</sub>O<sub>2</sub> decomposition (C<sub>0</sub> = 5 mmol L<sup>-1</sup>): (a) BiVO<sub>4</sub>, (b) 0.5 wt% NiS/BiVO<sub>4</sub>, (c) 1 wt% NiS/BiVO<sub>4</sub>, (d) 3 wt% NiS/BiVO<sub>4</sub>, (e) 5 wt% NiS/BiVO<sub>4</sub>, (f) 10 wt% NiS/BiVO<sub>4</sub> and (g) 20 wt% NiS/BiVO<sub>4</sub>.

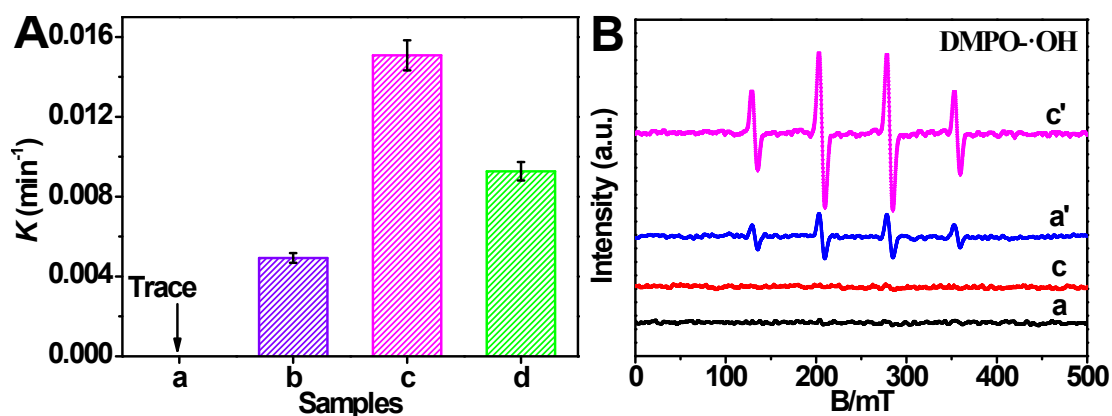

**Fig. S4.** (A) The rate constant (*k*) of MO decomposition and (B) ESR spectra of DMPO trapped ·OH radicals of various photocatalysts: (a) BiVO<sub>4</sub>, (b) 1 wt% NiS/BiVO<sub>4</sub>, (c) 10 wt% NiS/BiVO<sub>4</sub> and (d) 20 wt% NiS/BiVO<sub>4</sub> (a' and c'-light).

**Table S1** Element components (wt%) of various photocatalysts based on the ICP-OES results.

| Samples                     | Bi    | V     | O     | Ni   | S    |
|-----------------------------|-------|-------|-------|------|------|
| BiVO <sub>4</sub>           | 71.34 | 12.45 | 16.25 | —    | —    |
| 1 wt% NiS/BiVO <sub>4</sub> | 72.07 | 12.56 | 15.22 | 0.1  | 0.05 |
| 5 wt% NiS/BiVO <sub>4</sub> | 67.59 | 11.85 | 20.23 | 0.18 | 0.15 |

**Table S2** Element components (atom %) of various photocatalysts based on the XPS results.

| Samples                      | Bi    | V     | O     | Ni    | S    |
|------------------------------|-------|-------|-------|-------|------|
| BiVO <sub>4</sub>            | 18.08 | 11.94 | 69.98 | 0     | 0    |
| 1 wt% NiS/BiVO <sub>4</sub>  | 9.52  | 7.35  | 73.39 | 6.89  | 2.85 |
| 10 wt% NiS/BiVO <sub>4</sub> | 10.92 | 10.07 | 62.81 | 10.98 | 5.22 |

**Table S3** Comparisons of H<sub>2</sub>O<sub>2</sub> production for various photocatalysts.

| Photocatalysts                   | Maximum<br>formed H <sub>2</sub> O <sub>2</sub><br>( $\mu\text{mol}\cdot\text{L}^{-1}$ ) | AQE<br>(%) | H <sub>2</sub> O <sub>2</sub> formation<br>rate ( $\mu\text{mol}\cdot\text{L}^{-1}\cdot\text{h}^{-1}$ ) | $k_f$<br>( $\mu\text{mol}\cdot\text{L}^{-1}\cdot\text{min}^{-1}$ ) | $k_d$<br>( $\text{min}^{-1}$ ) |
|----------------------------------|------------------------------------------------------------------------------------------|------------|---------------------------------------------------------------------------------------------------------|--------------------------------------------------------------------|--------------------------------|
| BiVO <sub>4</sub>                | 11.25                                                                                    | 0.055      | 5.63                                                                                                    | 0.2397                                                             | 0.02761                        |
| 0.5 wt%<br>NiS/BiVO <sub>4</sub> | 41.07                                                                                    | 0.20       | 20.53                                                                                                   | 0.7226                                                             | 0.0157                         |
| 1 wt%<br>NiS/BiVO <sub>4</sub>   | 60.71                                                                                    | 0.30       | 30.36                                                                                                   | 1.3043                                                             | 0.013                          |
| 3 wt%<br>NiS/BiVO <sub>4</sub>   | 207.14                                                                                   | 1.02       | 103.57                                                                                                  | 2.7952                                                             | 0.0095                         |
| 5 wt%<br>NiS/BiVO <sub>4</sub>   | 285.71                                                                                   | 1.41       | 142.86                                                                                                  | 5.20                                                               | 0.011                          |
| 10 wt%<br>NiS/BiVO <sub>4</sub>  | 975                                                                                      | 4.8        | 487.5                                                                                                   | 7.5474                                                             | 0.0073                         |
| 20 wt%<br>NiS/BiVO <sub>4</sub>  | 428.57                                                                                   | 2.11       | 214.28                                                                                                  | 3.30                                                               | 0.009                          |



**Table S4** The fitted parameters obtained from decay curves of (a) BiVO<sub>4</sub> and (c) 10 wt% NiS/BiVO<sub>4</sub>.

| Samples                         | $\tau_1$<br>(ns) | $A_1$<br>(%) | $\tau_2$<br>(ns) | $A_2$<br>(%) | Average lifetime<br>( $\tau_a$ ) (ns) | $\chi^2$ |
|---------------------------------|------------------|--------------|------------------|--------------|---------------------------------------|----------|
| BiVO <sub>4</sub>               | 0.16             | 72.98        | 2.94             | 27.02        | 2.58                                  | 2.696    |
| 10 wt%<br>NiS/BiVO <sub>4</sub> | 0.16             | 71.49        | 3.09             | 28.51        | 2.75                                  | 2.564    |

The above fitted parameters are acquired via the following tri-exponential formulas:

$$\tau_a = (A_1\tau_1^2 + A_2\tau_2^2)/(A_1\tau_1 + A_2\tau_2)$$

where  $A_1$  and  $A_2$  represent the tri-exponential factors, and  $\tau_1$ ,  $\tau_2$  and  $\tau_a$  corresponds to the lifetime in various stages (radiation and non-radiation) and average lifetime, respectively.  $\chi^2$  is the goodness-of-fit.
